# Supplementary material for: Effect of Korean Red Ginseng on Plasma Ceramide Levels in Postmenopausal Women with Hypercholesterolemia: A Pilot Randomized Controlled Trial
Source: MDPI journal article supplement (doi:10.3390/metabo11070417), 2021-06-24
Supplement: s1 [file s1]

**Supplementary Table S1.** Selected reaction monitoring (SRM) transitions and collision energies for each lipid.

| No. | Class   | Species                                    | Adduct ion                        | Q1 ( <i>m/z</i> ) | Q3 ( <i>m/z</i> ) | CE (eV) | Retention time (min) |
|-----|---------|--------------------------------------------|-----------------------------------|-------------------|-------------------|---------|----------------------|
| 1   | PC      | 25:0<br>(12:0/13:0)                        | [M+H <sup>+</sup> ]               | 636.5             | 184.1             | 30      | 2.72                 |
| 2   | LPC     | 17:1                                       | [M+H <sup>+</sup> ]               | 508.4             | 184.1             | 25      | 1.58                 |
| 3   | PE      | <i>d</i> <sub>7</sub> -33:1<br>(18:0/15:1) | [M+H <sup>+</sup> ]               | 711.6             | 570.5             | 20      | 5                    |
| 4   | LPE     | 17:1                                       | [M+H <sup>+</sup> ]               | 466.4             | 325.3             | 25      | 1.57                 |
| 5   | CE      | 17:0                                       | [M+H <sup>+</sup> ]               | 656.6             | 369.3             | 18      | 16.7                 |
| 6   | SM      | 30:1 (18:1/12:0)                           | [M+H <sup>+</sup> ]               | 647.6             | 184.1             | 32      | 2.92                 |
| 7   | DG      | 16:0 (8:0/8:0)                             | [M+NH <sub>4</sub> <sup>+</sup> ] | 362.3             | 327.3             | 22      | 1.67                 |
| 8   | TG      | 45:0<br>(15:0/15:0/15:0)                   | [M+NH <sub>4</sub> <sup>+</sup> ] | 782.6             | 523.5             | 30      | 14.7                 |
| 9   | CER     | 30:1 (18:1/12:0)                           | [M+H <sup>+</sup> ]               | 482.5             | 264.3             | 25      | 3.33                 |
| 10  | AC      | <i>d</i> <sub>7</sub> -2:0                 | [M+H <sup>+</sup> ]               | 207.2             | 85.1              | 27      | 1.1                  |
| 11  | Gal-CER | 18:1/12:0                                  | [M+H <sup>+</sup> ]               | 644.5             | 264.3             | 35      | 2.75                 |
| 12  | SUL     | <i>d</i> <sub>3</sub> -18:1/18:0           | [M+H <sup>+</sup> ]               | 811.6             | 264.3             | 45      | 3.57                 |
| 13  | PC      | 30:2                                       | [M+H <sup>+</sup> ]               | 758.5             | 184.1             | 30      | 3.79                 |
| 14  |         | 30:1                                       |                                   | 760.5             | 184.1             | 30      | 4.41                 |
| 15  |         | 30:0                                       |                                   | 762.5             | 184.1             | 30      | 4.8                  |
| 16  |         | 32:2                                       |                                   | 780.5             | 184.1             | 30      | 4.11                 |
| 17  |         | 32:1                                       |                                   | 782.5             | 184.1             | 30      | 4.78                 |
| 18  |         | 32:0                                       |                                   | 784.5             | 184.1             | 30      | 5.54                 |
| 19  |         | 34:4                                       |                                   | 786.5             | 184.1             | 30      | 4.03                 |
| 20  |         | 34:3                                       |                                   | 788.5             | 184.1             | 30      | 4.46                 |
| 21  |         | 34:2                                       |                                   | 806.5             | 184.1             | 30      | 5.04                 |
| 22  |         | 34:1                                       |                                   | 808.5             | 184.1             | 30      | 5.73                 |
| 23  |         | 34:0                                       |                                   | 810.5             | 184.1             | 30      | 6.61                 |
| 24  |         | 36:5                                       |                                   | 812.5             | 184.1             | 30      | 4.41                 |
| 25  |         | 36:4                                       |                                   | 814.5             | 184.1             | 30      | 4.94                 |
| 26  |         | 36:3                                       |                                   | 816.5             | 184.1             | 30      | 5.33                 |
| 27  |         | 36:2                                       |                                   | 818.5             | 184.1             | 30      | 6.07                 |
| 28  |         | 36:1                                       |                                   | 834.5             | 184.1             | 30      | 6.82                 |
| 29  |         | 36:0                                       |                                   | 836.5             | 184.1             | 30      | 7.67                 |
| 30  |         | 38:7                                       |                                   | 838.5             | 184.1             | 30      | 4.06                 |
| 31  |         | 38:6                                       |                                   | 840.5             | 184.1             | 30      | 4.81                 |
| 32  |         | 38:5                                       |                                   | 842.5             | 184.1             | 30      | 5.23                 |
| 33  |         | 38:4                                       |                                   | 844.5             | 184.1             | 30      | 5.99                 |
| 34  |         | 38:3                                       |                                   | 742.6             | 184.1             | 30      | 6.44                 |
| 35  |         | 38:2                                       |                                   | 744.6             | 184.1             | 30      | 7.12                 |

|    |           |      |                     |       |       |    |      |
|----|-----------|------|---------------------|-------|-------|----|------|
| 36 |           | 38:1 |                     | 746.6 | 184.1 | 30 | 5.02 |
| 37 |           | 40:8 |                     | 766.6 | 184.1 | 30 | 4.34 |
| 38 |           | 40:7 |                     | 768.6 | 184.1 | 30 | 4.99 |
| 39 |           | 40:6 |                     | 770.6 | 184.1 | 30 | 5.84 |
| 40 |           | 40:5 |                     | 772.6 | 184.1 | 30 | 6.15 |
| 41 |           | 40:4 |                     | 774.6 | 184.1 | 30 | 6.82 |
| 42 |           | 30:2 |                     | 686.6 | 184.1 | 30 | 4.43 |
| 43 |           | 30:1 |                     | 688.6 | 184.1 | 30 | 3.98 |
| 44 |           | 30:0 |                     | 690.6 | 184.1 | 30 | 3.98 |
| 45 |           | 32:1 |                     | 716.6 | 184.1 | 30 | 5.25 |
| 46 |           | 32:0 |                     | 718.6 | 184.1 | 30 | 6.08 |
| 47 |           | 34:3 |                     | 740.6 | 184.1 | 30 | 4.85 |
| 48 |           | 34:2 |                     | 742.6 | 184.1 | 30 | 5.55 |
| 49 |           | 34:1 |                     | 744.6 | 184.1 | 30 | 6.29 |
| 50 |           | 34:0 |                     | 746.6 | 184.1 | 30 | 6.45 |
| 51 |           | 36:5 |                     | 764.6 | 184.1 | 30 | 4.83 |
| 52 |           | 36:4 |                     | 766.6 | 184.1 | 30 | 5.41 |
| 53 | Plasmenyl | 36:2 | [M+H <sup>+</sup> ] | 770.6 | 184.1 | 30 | 5.93 |
| 54 | PC        | 36:1 |                     | 772.6 | 184.1 | 30 | 6.8  |
| 55 |           | 36:0 |                     | 774.6 | 184.1 | 30 | 7.05 |
| 56 |           | 38:6 |                     | 790.6 | 184.1 | 30 | 5.26 |
| 57 |           | 38:5 |                     | 792.6 | 184.1 | 30 | 5.52 |
| 58 |           | 38:4 |                     | 794.6 | 184.1 | 30 | 5.78 |
| 59 |           | 38:1 |                     | 800.6 | 184.1 | 30 | 7.31 |
| 60 |           | 40:7 |                     | 816.6 | 184.1 | 30 | 5.02 |
| 61 |           | 40:6 |                     | 818.6 | 184.1 | 30 | 5.67 |
| 62 |           | 40:5 |                     | 820.6 | 184.1 | 30 | 6    |
| 63 |           | 40:4 |                     | 822.6 | 184.1 | 30 | 6.89 |
| 64 |           | 40:3 |                     | 824.6 | 184.1 | 30 | 7.88 |
| 65 |           | 16:1 |                     | 494.3 | 184.1 | 25 | 1.52 |
| 66 |           | 16:0 |                     | 496.3 | 184.1 | 25 | 1.64 |
| 67 |           | 18:3 |                     | 518.3 | 184.1 | 25 | 1.46 |
| 68 |           | 18:2 |                     | 520.3 | 184.1 | 25 | 1.58 |
| 69 | LPC       | 18:1 | [M+H <sup>+</sup> ] | 522.3 | 184.1 | 25 | 1.7  |
| 70 |           | 18:0 |                     | 524.3 | 184.1 | 25 | 1.93 |
| 71 |           | 20:5 |                     | 542.3 | 184.1 | 25 | 1.46 |
| 72 |           | 20:4 |                     | 544.3 | 184.1 | 25 | 1.52 |
| 73 |           | 20:3 |                     | 546.3 | 184.1 | 25 | 1.64 |
| 74 |           | 22:6 |                     | 568.3 | 184.1 | 25 | 1.52 |
| 75 |           | 34:3 |                     | 714.6 | 573.5 | 20 | 4.33 |
| 76 |           | 34:2 |                     | 716.6 | 575.5 | 20 | 4.87 |
| 77 | PE        | 34:1 | [M+H <sup>+</sup> ] | 718.6 | 577.5 | 20 | 5.53 |
| 78 |           | 36:5 |                     | 738.6 | 597.5 | 20 | 4.27 |
| 79 |           | 36:4 |                     | 740.6 | 599.5 | 20 | 4.78 |

|     |           |                  |                     |       |       |    |      |
|-----|-----------|------------------|---------------------|-------|-------|----|------|
| 80  |           | 36:3             |                     | 742.6 | 601.5 | 20 | 5.09 |
| 81  |           | 36:2             |                     | 744.6 | 603.5 | 20 | 5.89 |
| 82  |           | 36:1             |                     | 746.6 | 605.5 | 20 | 6.58 |
| 83  |           | 38:6             |                     | 764.6 | 623.5 | 20 | 4.69 |
| 84  |           | 38:5             |                     | 766.6 | 625.5 | 20 | 5.16 |
| 85  |           | 38:4             |                     | 768.6 | 627.5 | 20 | 5.8  |
| 86  |           | 38:3             |                     | 770.6 | 629.5 | 20 | 6.22 |
| 87  |           | 40:7             |                     | 790.6 | 649.5 | 20 | 4.85 |
| 88  |           | 40:6             |                     | 792.6 | 651.5 | 20 | 5.67 |
| 89  |           | 40:5             |                     | 794.6 | 653.5 | 20 | 5.98 |
| 90  |           | 40:4             |                     | 796.6 | 655.5 | 20 | 6.61 |
| 91  |           | 16:0             |                     | 454.3 | 313.2 | 25 | 1.63 |
| 92  |           | 18:2             |                     | 478.3 | 337.2 | 25 | 1.51 |
| 93  | LPE       | 18:1             | [M+H <sup>+</sup> ] | 480.3 | 339.2 | 25 | 1.67 |
| 94  |           | 18:0             |                     | 482.3 | 341.2 | 25 | 1.88 |
| 95  |           | 22:6             |                     | 526.3 | 385.2 | 25 | 1.49 |
| 96  |           | 34:3 (16:0/18:3) |                     | 698.5 | 335.2 | 25 | 4.79 |
| 97  |           | 34:2 (16:0/18:2) |                     | 700.5 | 337.2 | 25 | 5.36 |
| 98  |           | 34:1 (16:0/18:1) |                     | 702.5 | 339.2 | 25 | 6.1  |
| 99  |           | 36:5 (16:0/20:5) |                     | 722.6 | 359.2 | 25 | 4.69 |
| 100 |           | 36:4 (16:0/20:4) |                     | 724.6 | 361.2 | 25 | 5.28 |
| 101 |           | 36:3 (16:0/20:3) |                     | 726.6 | 363.2 | 25 | 5.73 |
| 102 |           | 38:6 (16:0/22:6) |                     | 748.6 | 385.2 | 25 | 5.13 |
| 103 |           | 38:5 (16:0/22:5) |                     | 750.6 | 387.2 | 25 | 5.46 |
| 104 |           | 38:4 (16:0/22:4) |                     | 752.6 | 389.2 | 25 | 6.1  |
| 105 |           | 36:3 (18:0/18:3) |                     | 726.6 | 335.2 | 25 | 5.8  |
| 106 |           | 36:2 (18:0/18:2) |                     | 728.6 | 337.2 | 25 | 6.43 |
| 107 | Plasmenyl | 36:1 (18:0/18:1) | [M+H <sup>+</sup> ] | 730.6 | 339.2 | 25 | 7.2  |
| 108 | PE        | 38:5 (18:0/20:5) |                     | 750.6 | 359.2 | 25 | 5.71 |
| 109 |           | 38:4 (18:0/20:4) |                     | 752.6 | 361.2 | 25 | 6.32 |
| 110 |           | 38:3 (18:0/20:3) |                     | 754.6 | 363.2 | 25 | 6.78 |
| 111 |           | 40:6 (18:0/22:6) |                     | 776.6 | 385.2 | 25 | 6.17 |
| 112 |           | 34:1 (18:1/16:0) |                     | 702.5 | 313.2 | 25 | 6.09 |
| 113 |           | 36:3 (18:1/18:2) |                     | 726.6 | 337.2 | 25 | 5.56 |
| 114 |           | 36:2 (18:1/18:1) |                     | 728.6 | 339.2 | 25 | 6.3  |
| 115 |           | 38:6 (18:1/20:5) |                     | 748.6 | 359.2 | 25 | 4.89 |
| 116 |           | 38:5 (18:1/20:4) |                     | 750.6 | 361.2 | 25 | 5.49 |
| 117 |           | 38:4 (18:1/20:3) |                     | 752.6 | 363.2 | 25 | 5.94 |
| 118 |           | 40:7 (18:1/22:6) |                     | 774.6 | 385.2 | 25 | 5.34 |
| 119 |           | 40:6 (18:1/22:5) |                     | 776.6 | 387.2 | 25 | 5.65 |
| 120 |           | 40:5 (18:1/22:4) |                     | 778.6 | 389.2 | 25 | 6.28 |
| 121 | CER       | 34:2             | [M+H <sup>+</sup> ] | 536.5 | 264.3 | 25 | 4.61 |

|     |         |      |                     |       |       |    |       |
|-----|---------|------|---------------------|-------|-------|----|-------|
| 122 |         | 34:1 |                     | 538.5 | 264.3 | 25 | 5.07  |
| 123 |         | 36:1 |                     | 566.5 | 264.3 | 25 | 6.13  |
| 124 |         | 38:1 |                     | 594.5 | 264.3 | 25 | 7.28  |
| 125 |         | 40:2 |                     | 620.6 | 264.3 | 25 | 7.85  |
| 126 |         | 40:1 |                     | 622.6 | 264.3 | 25 | 8.46  |
| 127 |         | 42:2 |                     | 648.6 | 264.3 | 25 | 9.05  |
| 128 |         | 42:1 |                     | 650.6 | 264.3 | 25 | 9.66  |
| 129 |         | 34:2 |                     | 701.6 | 184.1 | 32 | 3.78  |
| 130 |         | 34:1 |                     | 703.6 | 184.1 | 32 | 4.42  |
| 131 |         | 34:0 |                     | 705.6 | 184.1 | 32 | 4.84  |
| 132 |         | 36:3 |                     | 727.6 | 184.1 | 32 | 4.01  |
| 133 |         | 36:2 |                     | 729.6 | 184.1 | 32 | 4.64  |
| 134 |         | 36:1 |                     | 731.6 | 184.1 | 32 | 5.39  |
| 135 | SM      | 38:3 | [M+H <sup>+</sup> ] | 755.6 | 184.1 | 32 | 4.01  |
| 136 |         | 38:2 |                     | 757.6 | 184.1 | 32 | 4.46  |
| 137 |         | 38:1 |                     | 759.6 | 184.1 | 32 | 5.05  |
| 138 |         | 40:3 |                     | 783.6 | 184.1 | 32 | 4.92  |
| 139 |         | 40:2 |                     | 785.6 | 184.1 | 32 | 5.33  |
| 140 |         | 40:1 |                     | 787.6 | 184.1 | 32 | 6.08  |
| 141 |         | 40:0 |                     | 789.6 | 184.1 | 32 | 6.84  |
| 142 |         | 34:2 |                     | 860.6 | 264.3 | 42 | 3.52  |
| 143 |         | 34:1 |                     | 862.6 | 264.3 | 42 | 3.84  |
| 144 | Lac-CER | 40:1 | [M+H <sup>+</sup> ] | 946.6 | 264.3 | 42 | 5.01  |
| 145 |         | 42:2 |                     | 972.6 | 264.3 | 42 | 6.79  |
| 146 |         | 42:1 |                     | 974.6 | 264.3 | 42 | 7.77  |
| 147 |         | 34:2 |                     | 698.5 | 264.3 | 42 | 3.94  |
| 148 |         | 34:1 |                     | 700.5 | 264.3 | 42 | 4.18  |
| 149 |         | 36:2 |                     | 726.5 | 264.3 | 42 | 4.43  |
| 150 |         | 36:1 |                     | 728.5 | 264.3 | 42 | 5.12  |
| 151 | Gal-CER | 38:1 | [M+H <sup>+</sup> ] | 756.5 | 264.3 | 42 | 6.13  |
| 152 |         | 40:2 |                     | 782.5 | 264.3 | 42 | 6.91  |
| 153 |         | 40:1 |                     | 784.5 | 264.3 | 42 | 7.21  |
| 154 |         | 42:2 |                     | 810.6 | 264.3 | 42 | 8.01  |
| 155 |         | 42:1 |                     | 812.5 | 264.3 | 42 | 8.34  |
| 156 | SUL     | 34:1 |                     | 780.5 | 264.3 | 45 | 7.8   |
| 157 |         | 36:1 |                     | 808.5 | 264.3 | 45 | 7.02  |
| 158 |         | 34:2 |                     | 794.5 | 264.3 | 45 | 8.36  |
| 159 |         | 40:2 | [M+H <sup>+</sup> ] | 878.5 | 264.3 | 45 | 15.03 |
| 160 | HSUL    | 40:1 |                     | 880.5 | 264.3 | 45 | 15.69 |
| 161 |         | 42:2 |                     | 906.5 | 264.3 | 45 | 15.85 |
| 162 |         | 42:1 |                     | 908.5 | 264.3 | 45 | 16.51 |
| 163 |         | 16:1 |                     | 640.6 | 369.3 | 18 | 15.31 |
| 164 | CE      | 16:0 | [M+H <sup>+</sup> ] | 642.6 | 369.3 | 18 | 16.2  |
| 165 |         | 18:3 |                     | 664.6 | 369.3 | 18 | 14.83 |

|     |    |                          |                                   |       |       |    |       |
|-----|----|--------------------------|-----------------------------------|-------|-------|----|-------|
| 166 |    | 18:2                     |                                   | 666.6 | 369.3 | 18 | 15.57 |
| 167 |    | 18:1                     |                                   | 668.6 | 369.3 | 18 | 16.35 |
| 168 |    | 18:0                     |                                   | 670.6 | 369.3 | 18 | 17.18 |
| 169 |    | 20:5                     |                                   | 688.6 | 369.3 | 18 | 14.54 |
| 170 |    | 20:4                     |                                   | 690.6 | 369.3 | 18 | 15.29 |
| 171 |    | 20:3                     |                                   | 692.6 | 369.3 | 18 | 15.85 |
| 172 |    | 20:2                     |                                   | 694.6 | 369.3 | 18 | 16.56 |
| 173 |    | 22:6                     |                                   | 714.6 | 369.3 | 18 | 14.98 |
| 174 |    | 22:5                     |                                   | 716.6 | 369.3 | 18 | 15.44 |
| 175 |    | 22:4                     |                                   | 718.6 | 369.3 | 18 | 16.12 |
| 176 |    | 16:1                     |                                   | 346.3 | 311.3 | 18 | 1.11  |
| 177 |    | 16:0                     |                                   | 348.3 | 313.3 | 18 | 1.95  |
| 178 | MG | 18:3                     | [M+NH <sub>4</sub> <sup>+</sup> ] | 370.3 | 335.3 | 18 | 1.44  |
| 179 |    | 18:1                     |                                   | 374.3 | 339.3 | 18 | 2.01  |
| 180 |    | 18:0                     |                                   | 376.3 | 341.3 | 18 | 2.32  |
| 181 |    | 32:2                     |                                   | 582.5 | 547.5 | 22 | 5.72  |
| 182 |    | 32:1                     |                                   | 584.5 | 549.5 | 22 | 6.53  |
| 183 |    | 32:0                     |                                   | 586.5 | 551.5 | 22 | 7.44  |
| 184 | DG | 34:3                     | [M+NH <sub>4</sub> <sup>+</sup> ] | 608.5 | 573.5 | 22 | 5.99  |
| 185 |    | 34:2                     |                                   | 610.5 | 575.5 | 22 | 6.85  |
| 186 |    | 34:1                     |                                   | 612.5 | 577.5 | 22 | 7.71  |
| 187 |    | 36:4                     |                                   | 634.5 | 599.5 | 22 | 6.34  |
| 188 |    | 36:3                     |                                   | 636.5 | 601.5 | 22 | 7.12  |
| 189 |    | 46:2<br>(16:1/14:0/16:1) |                                   | 792.7 | 521.5 | 30 | 13.58 |
| 190 |    | 46:1<br>(14:0/16:1/16:0) |                                   | 794.7 | 549.5 | 30 | 14.36 |
| 191 |    | 46:0<br>(16:0/14:0/16:0) |                                   | 796.7 | 523.3 | 30 | 15.16 |
| 192 |    | 48:3<br>(16:1/18:2/14:0) |                                   | 818.7 | 547.4 | 30 | 13.81 |
| 193 |    | 48:2<br>(16:1/14:0/18:1) |                                   | 820.7 | 549.4 | 30 | 14.53 |
| 194 | TG | 48:1<br>(16:0/14:0/18:1) | [M+NH <sub>4</sub> <sup>+</sup> ] | 822.7 | 549.4 | 30 | 15.32 |
| 195 |    | 48:0<br>(16:0/16:0/16:0) |                                   | 824.7 | 551.3 | 30 | 16.04 |
| 196 |    | 50:4<br>(16:1/18:2/16:1) |                                   | 844.7 | 573.4 | 30 | 14.05 |
| 197 |    | 50:3<br>(16:1/18:1/16:1) |                                   | 846.7 | 575.4 | 30 | 14.77 |
| 198 |    | 50:2<br>(18:1/16:1/16:0) |                                   | 848.7 | 549.4 | 30 | 15.46 |
| 199 |    | 50:1<br>(16:0/18:1/16:0) |                                   | 850.8 | 577.5 | 30 | 16.18 |
| 200 |    | 50:0<br>(18:0/14:0/18:0) |                                   | 852.8 | 551.3 | 30 | 16.85 |

|     |    |                          |       |       |    |       |
|-----|----|--------------------------|-------|-------|----|-------|
| 201 |    | 52:4<br>(18:2/16:1/18:1) | 872.7 | 575.4 | 30 | 15.02 |
| 202 |    | 52:3<br>(18:1/16:1/18:1) | 874.8 | 575.4 | 30 | 15.69 |
| 203 |    | 52:2<br>(18:1/16:0/18:1) | 876.8 | 577.4 | 30 | 16.31 |
| 204 |    | 52:1<br>(16:0/18:1/18:0) | 878.8 | 605.5 | 30 | 16.97 |
| 205 |    | 54:7<br>(20:4/16:1/18:2) | 894.7 | 573.5 | 30 | 14.2  |
| 206 |    | 54:6<br>(20:4/16:0/18:2) | 896.7 | 575.5 | 30 | 14.88 |
| 207 |    | 54:5<br>(18:2/18:2/18:1) | 898.8 | 601.5 | 30 | 15.19 |
| 208 |    | 54:4<br>(18:1/18:2/18:1) | 900.8 | 601.4 | 30 | 15.83 |
| 209 |    | 54:3<br>(18:1/18:1/18:1) | 902.8 | 603.5 | 30 | 16.45 |
| 210 |    | 54:2<br>(18:1/20:1/16:0) | 904.8 | 605.5 | 30 | 17.09 |
| 211 |    | 54:1<br>(18:0/18:1/18:0) | 906.8 | 605.3 | 30 | 17.76 |
| 212 |    | 56:8<br>(22:6/16:0/18:2) | 920.7 | 575.5 | 30 | 14.65 |
| 213 |    | 56:7<br>(22:6/16:0/18:1) | 922.8 | 577.3 | 30 | 15.34 |
| 214 |    | 56:6<br>(18:1/18:1/20:4) | 924.8 | 625.5 | 30 | 15.68 |
| 215 |    | 56:5<br>(18:1/18:1/20:3) | 926.8 | 627.3 | 30 | 16.22 |
| 216 |    | 56:4<br>(18:1/18:2/20:1) | 928.8 | 629.5 | 30 | 16.61 |
| 217 |    | 56:3<br>(18:1/18:1/20:1) | 930.8 | 631.5 | 30 | 17.2  |
| 218 |    | 14:2                     | 368.3 | 85.1  | 27 | 1.33  |
| 219 |    | 14:0                     | 372.3 | 85.1  | 27 | 1.57  |
| 220 | AC | 16:1                     | 398.3 | 85.1  | 27 | 1.53  |
| 221 |    | 16:0                     | 400.3 | 85.1  | 27 | 1.71  |
| 222 |    | 18:2                     | 424.4 | 85.1  | 27 | 1.71  |
| 223 |    | 18:0                     | 428.4 | 85.1  | 27 | 1.91  |
|     |    |                          |       |       |    |       |

AC, d<sub>7</sub>-acetylcarnitine; CE, cholesteryl ester; CER, ceramide; DAG, diacylglycerol; DG, diglycerides; Gal-SER, α-galactosylceramide; HSUL, hydroxysulfatide; Lac-CER, lactosylceramide; LPC, lysoPC; LPE, lysoPE; MG, monoglycerides; PC, phosphatidylcholine; PE, phosphatidylethanolamine; SM, sphingomyelin; SUL sulfatide, ; TAG, triacylglycerol; TG, triglycerides.
