# Supplementary figures and images for: Effect of Korean Red Ginseng on Plasma Ceramide Levels in Postmenopausal Women with Hypercholesterolemia: A Pilot Randomized Controlled Trial
Source: MDPI journal article supplement (doi:10.3390/metabo11070417), 2021-06-24

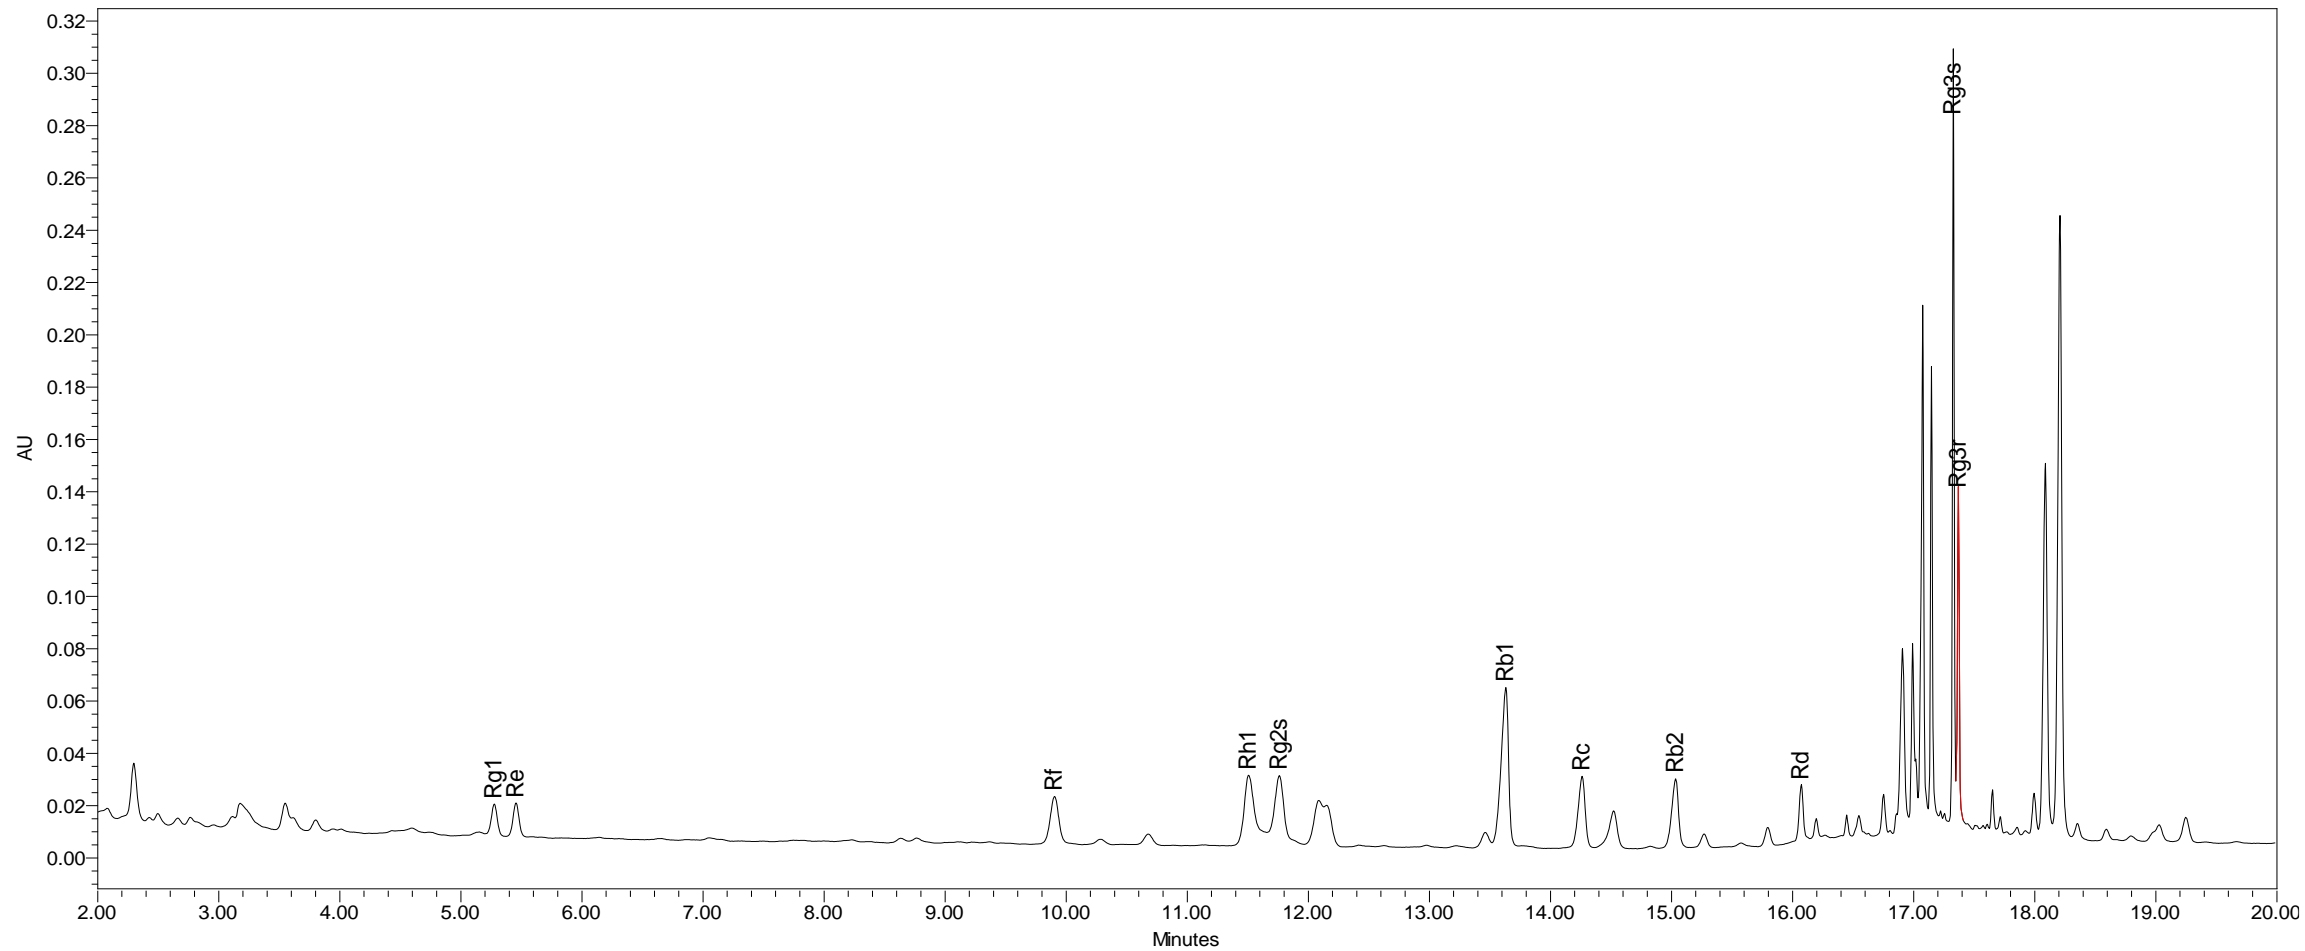

Supplement: s1 [file s1]
